# Supplementary material for: Complete Acid Ceramidase ablation prevents cancer-initiating cell formation in melanoma cells
Source: PubMed Central journal article supplement (PMC5547127; doi:10.1038/s41598-017-07606-w), 2017-08-07
Supplement: 41598_2017_7606_MOESM1_ESM.pdf [file 41598_2017_7606_MOESM1_ESM.pdf]

**Complete Acid Ceramidase ablation prevents cancer-initiating cell  
formation in melanoma cells – Supplementary Table 1**

Michele Lai<sup>1234</sup>, Natalia Realini<sup>1</sup>, Marco La Ferla<sup>2</sup>, Ilaria Passalacqua<sup>3</sup>, Giulia Matteoli<sup>3</sup>

Anand Ganesan<sup>5</sup>, Mauro Pistello<sup>3</sup>, Chiara Maria Mazzanti<sup>2\*</sup>, Daniele Piomelli<sup>4\*</sup>

1 Drug Discovery and Development, Istituto Italiano di Tecnologia, Genova 16163, Italy

2 Pisa Science Foundation, Pisa, Italy 56121

3 Retrovirus Center and Virology Section, Department of Translational Research, University of Pisa, Pisa, Italy

4 Departments of Anatomy and Neurobiology, Pharmacology and Biological Chemistry, University of California, Irvine,  
California 92617

5 Department of Dermatology, University of California, Irvine, California 92868

## Gene Tables

### Apoptosis Panel

#### Array Layout

|          |          |         |         |        |         |         |           |           |           |          |          |
|----------|----------|---------|---------|--------|---------|---------|-----------|-----------|-----------|----------|----------|
| ABL1     | AIFM1    | AKT1    | APAF1   | BAD    | BAG1    | BAG3    | BAK1      | BAX       | BCL10     | BCL2     | BCL2A1   |
| A01      | A02      | A03     | A04     | A05    | A06     | A07     | A08       | A09       | A10       | A11      | A12      |
| BCL2L1   | BCL2L10  | BCL2L11 | BCL2L2  | BFAR   | BID     | BIK     | BIRC2     | BIRC3     | BIRC5     | BIRC6    | BNIP2    |
| B01      | B02      | B03     | B04     | B05    | B06     | B07     | B08       | B09       | B10       | B11      | B12      |
| BNIP3    | BNIP3L   | BRAF    | CASP1   | CASP10 | CASP14  | CASP2   | CASP3     | CASP4     | CASP5     | CASP6    | CASP7    |
| C01      | C02      | C03     | C04     | C05    | C06     | C07     | C08       | C09       | C10       | C11      | C12      |
| CASP8    | CASP9    | CD27    | CD40    | CD40LG | CD70    | CFLAR   | CIDEA     | CIDEB     | CRADD     | CYCS     | DAPK1    |
| D01      | D02      | D03     | D04     | D05    | D06     | D07     | D08       | D09       | D10       | D11      | D12      |
| DFFA     | DIABLO   | FADD    | FAS     | FASLG  | GADD45A | HRK     | IGF1R     | IL10      | LTA       | LTBR     | MCL1     |
| E01      | E02      | E03     | E04     | E05    | E06     | E07     | E08       | E09       | E10       | E11      | E12      |
| NAIP     | NFKB1    | NOD1    | NOL3    | PYCARD | RIPK2   | TNF     | TNFRSF10A | TNFRSF10B | TNFRSF11B | TNFRSF1A | TNFRSF1B |
| F01      | F02      | F03     | F04     | F05    | F06     | F07     | F08       | F09       | F10       | F11      | F12      |
| TNFRSF21 | TNFRSF25 | TNFRSF9 | TNFSF10 | TNFSF8 | TP53    | TP53BP2 | TP73      | TRADD     | TRAF2     | TRAF3    | XIAP     |
| G01      | G02      | G03     | G04     | G05    | G06     | G07     | G08       | G09       | G10       | G11      | G12      |
| ACTB     | B2M      | GAPDH   | HPRT1   | RPLP0  | HGDC    | RTC     | RTC       | RTC       | PPC       | PPC      | PPC      |
| H01      | H02      | H03     | H04     | H05    | H06     | H07     | H08       | H09       | H10       | H11      | H12      |

### Senescence Panel

|        |        |         |        |        |        |         |          |          |         |         |        |
|--------|--------|---------|--------|--------|--------|---------|----------|----------|---------|---------|--------|
| ABL1   | AKT1   | ALDH1A3 | ATM    | BMI1   | CALR   | CCNA2   | CCNB1    | CCND1    | CCNE1   | CD44    | CDC25C |
| A01    | A02    | A03     | A04    | A05    | A06    | A07     | A08      | A09      | A10     | A11     | A12    |
| CDK2   | CDK4   | CDK6    | CDKN1A | CDKN1B | CDKN1C | CDKN2A  | CDKN2B   | CDKN2C   | CDKN2D  | CHEK1   | CHEK2  |
| B01    | B02    | B03     | B04    | B05    | B06    | B07     | B08      | B09      | B10     | B11     | B12    |
| CITED2 | COL1A1 | COL3A1  | CREG1  | E2F1   | E2F3   | EGR1    | ETS1     | ETS2     | FN1     | GADD45A | GLB1   |
| C01    | C02    | C03     | C04    | C05    | C06    | C07     | C08      | C09      | C10     | C11     | C12    |
| GSK3B  | HRAS   | ID1     | IPNG   | IGF1   | IGF1R  | IGFBP3  | IGFBP5   | IGFBP7   | ING1    | IRF3    | IRF5   |
| D01    | D02    | D03     | D04    | D05    | D06    | D07     | D08      | D09      | D10     | D11     | D12    |
| IRF7   | MAP2K1 | MAP2K3  | MAP2K6 | MAPK14 | MDM2   | MORC3   | MYC      | NBN      | NFKB1   | NOX4    | PCNA   |
| E01    | E02    | E03     | E04    | E05    | E06    | E07     | E08      | E09      | E10     | E11     | E12    |
| PIK3CA | PLAU   | PRKCD   | PTEN   | RB1    | RBL1   | RBL2    | SERPINB2 | SERPINE1 | SIRT1   | SOD1    | SOD2   |
| F01    | F02    | F03     | F04    | F05    | F06    | F07     | F08      | F09      | F10     | F11     | F12    |
| SPARC  | TBX2   | TBX3    | TERF2  | TERT   | TGFB1  | TGFB1I1 | THBS1    | TP53     | TP53BP1 | TWIST1  | VIM    |
| G01    | G02    | G03     | G04    | G05    | G06    | G07     | G08      | G09      | G10     | G11     | G12    |
| B2M    | HPRT1  | RPL13A  | GAPDH  | ACTB   | HGDC   | RTC     | RTC      | RTC      | PPC     | PPC     | PPC    |
| H01    | H02    | H03     | H04    | H05    | H06    | H07     | H08      | H09      | H10     | H11     | H12    |
